# Supplementary material for: DECIDE: a cluster-randomized controlled trial to reduce unnecessary caesarean deliveries in Burkina Faso
Source: Springer Nature journal article supplement (doi:10.1186/s12916-019-1320-y), 2019-05-02

## Algorithm: Vaginal birth after caesarean (VBAC)

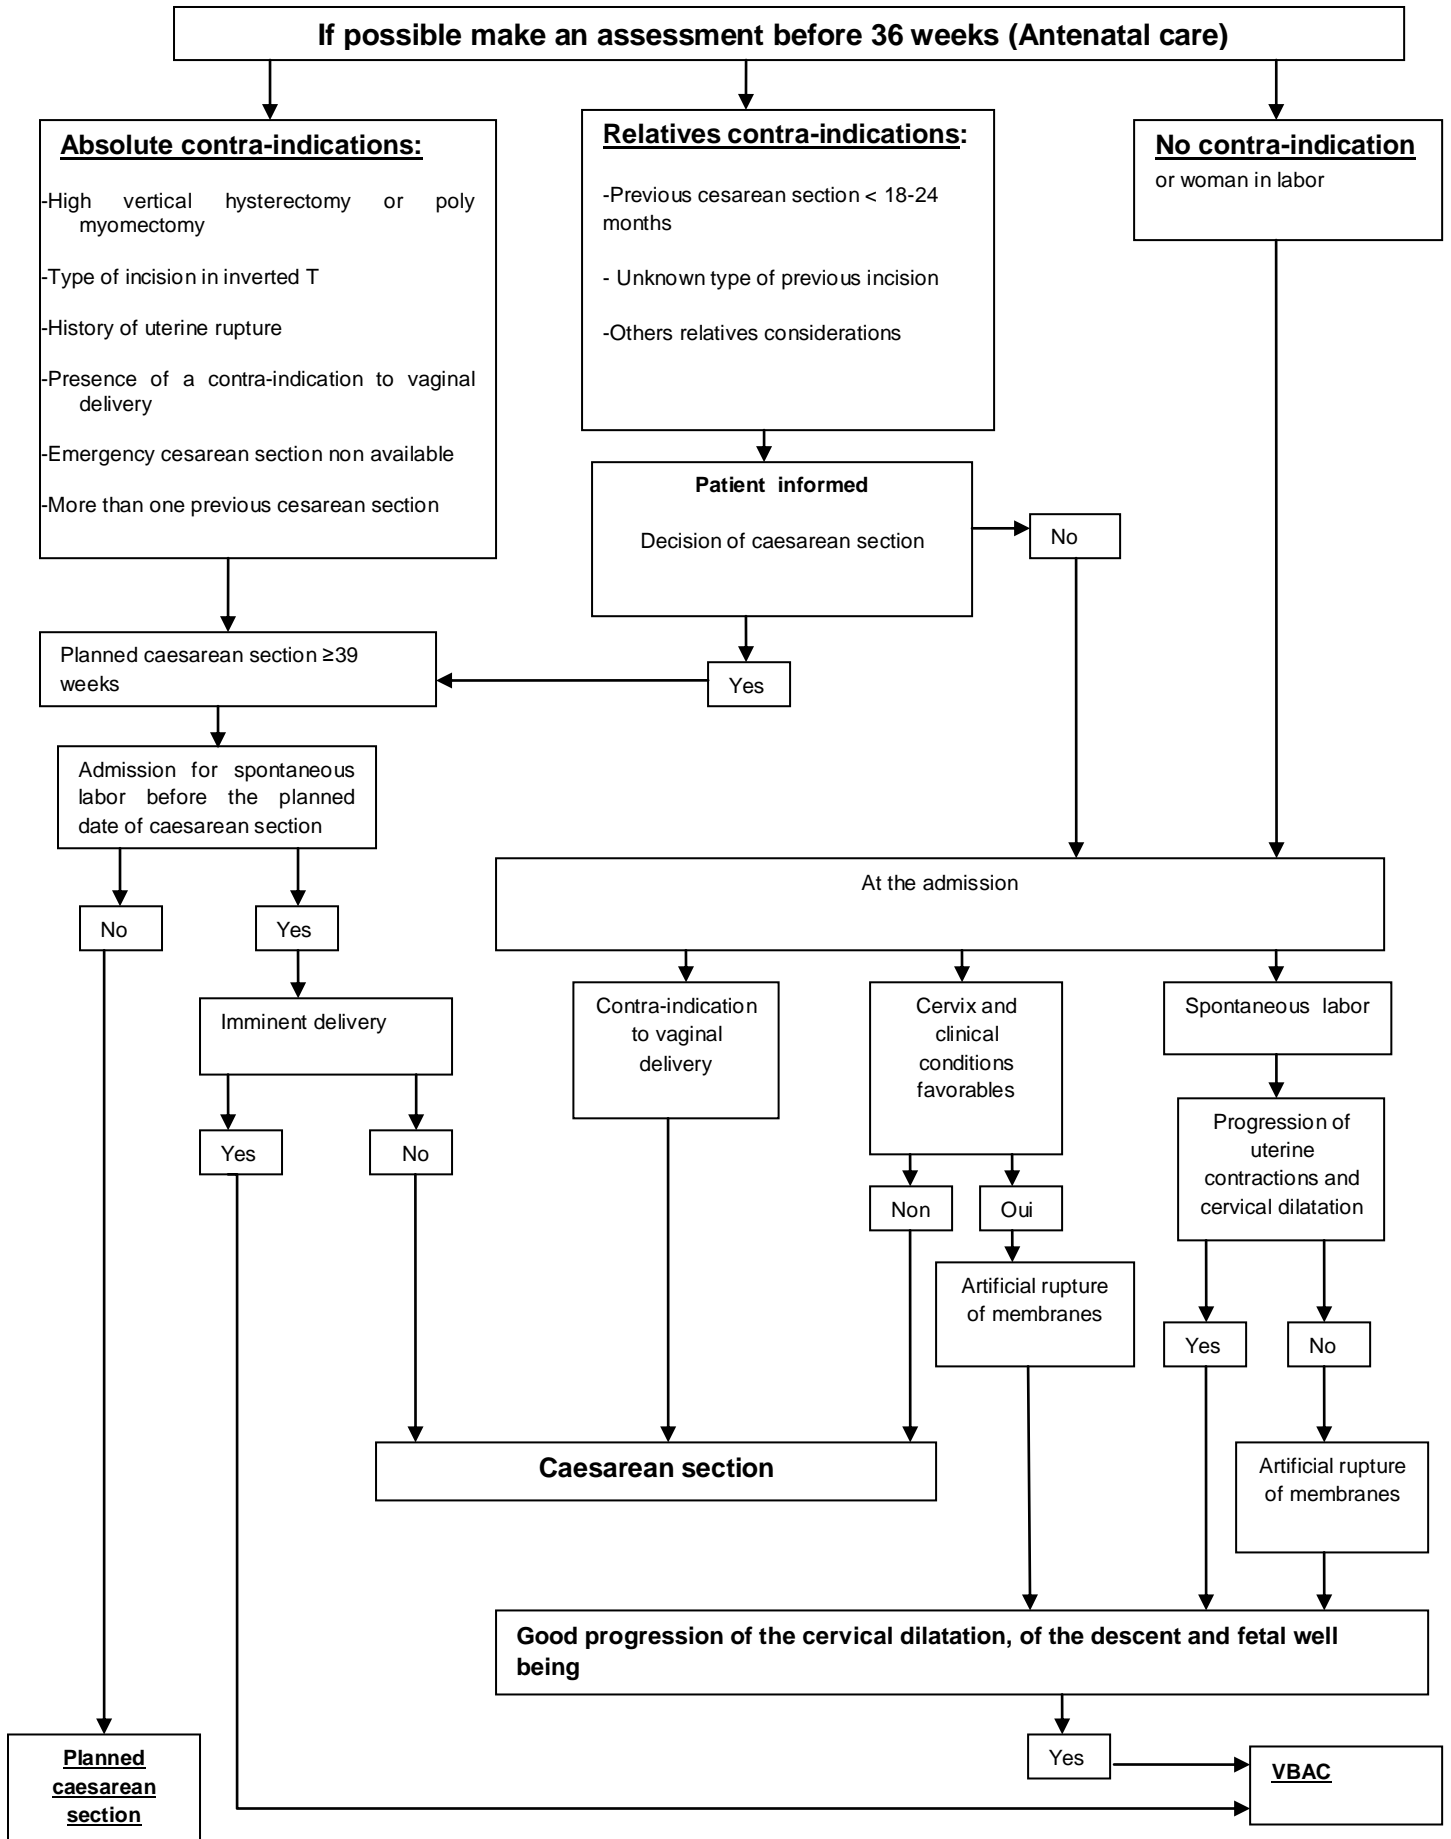

Supplement: MOESM3 [file 16692028]
