# Supplementary material for: DECIDE: a cluster-randomized controlled trial to reduce unnecessary caesarean deliveries in Burkina Faso
Source: Springer Nature journal article supplement (doi:10.1186/s12916-019-1320-y), 2019-05-02
Supplement: MOESM4 [file 16692028]

## Algorithm: Moderate pre-eclampsia

**Preeclampsia: Diastolic Blood Pressure (DBP)  $\geq$ 90 mmHg and proteinuria  $>$  0.3 g / l (two crosses)**

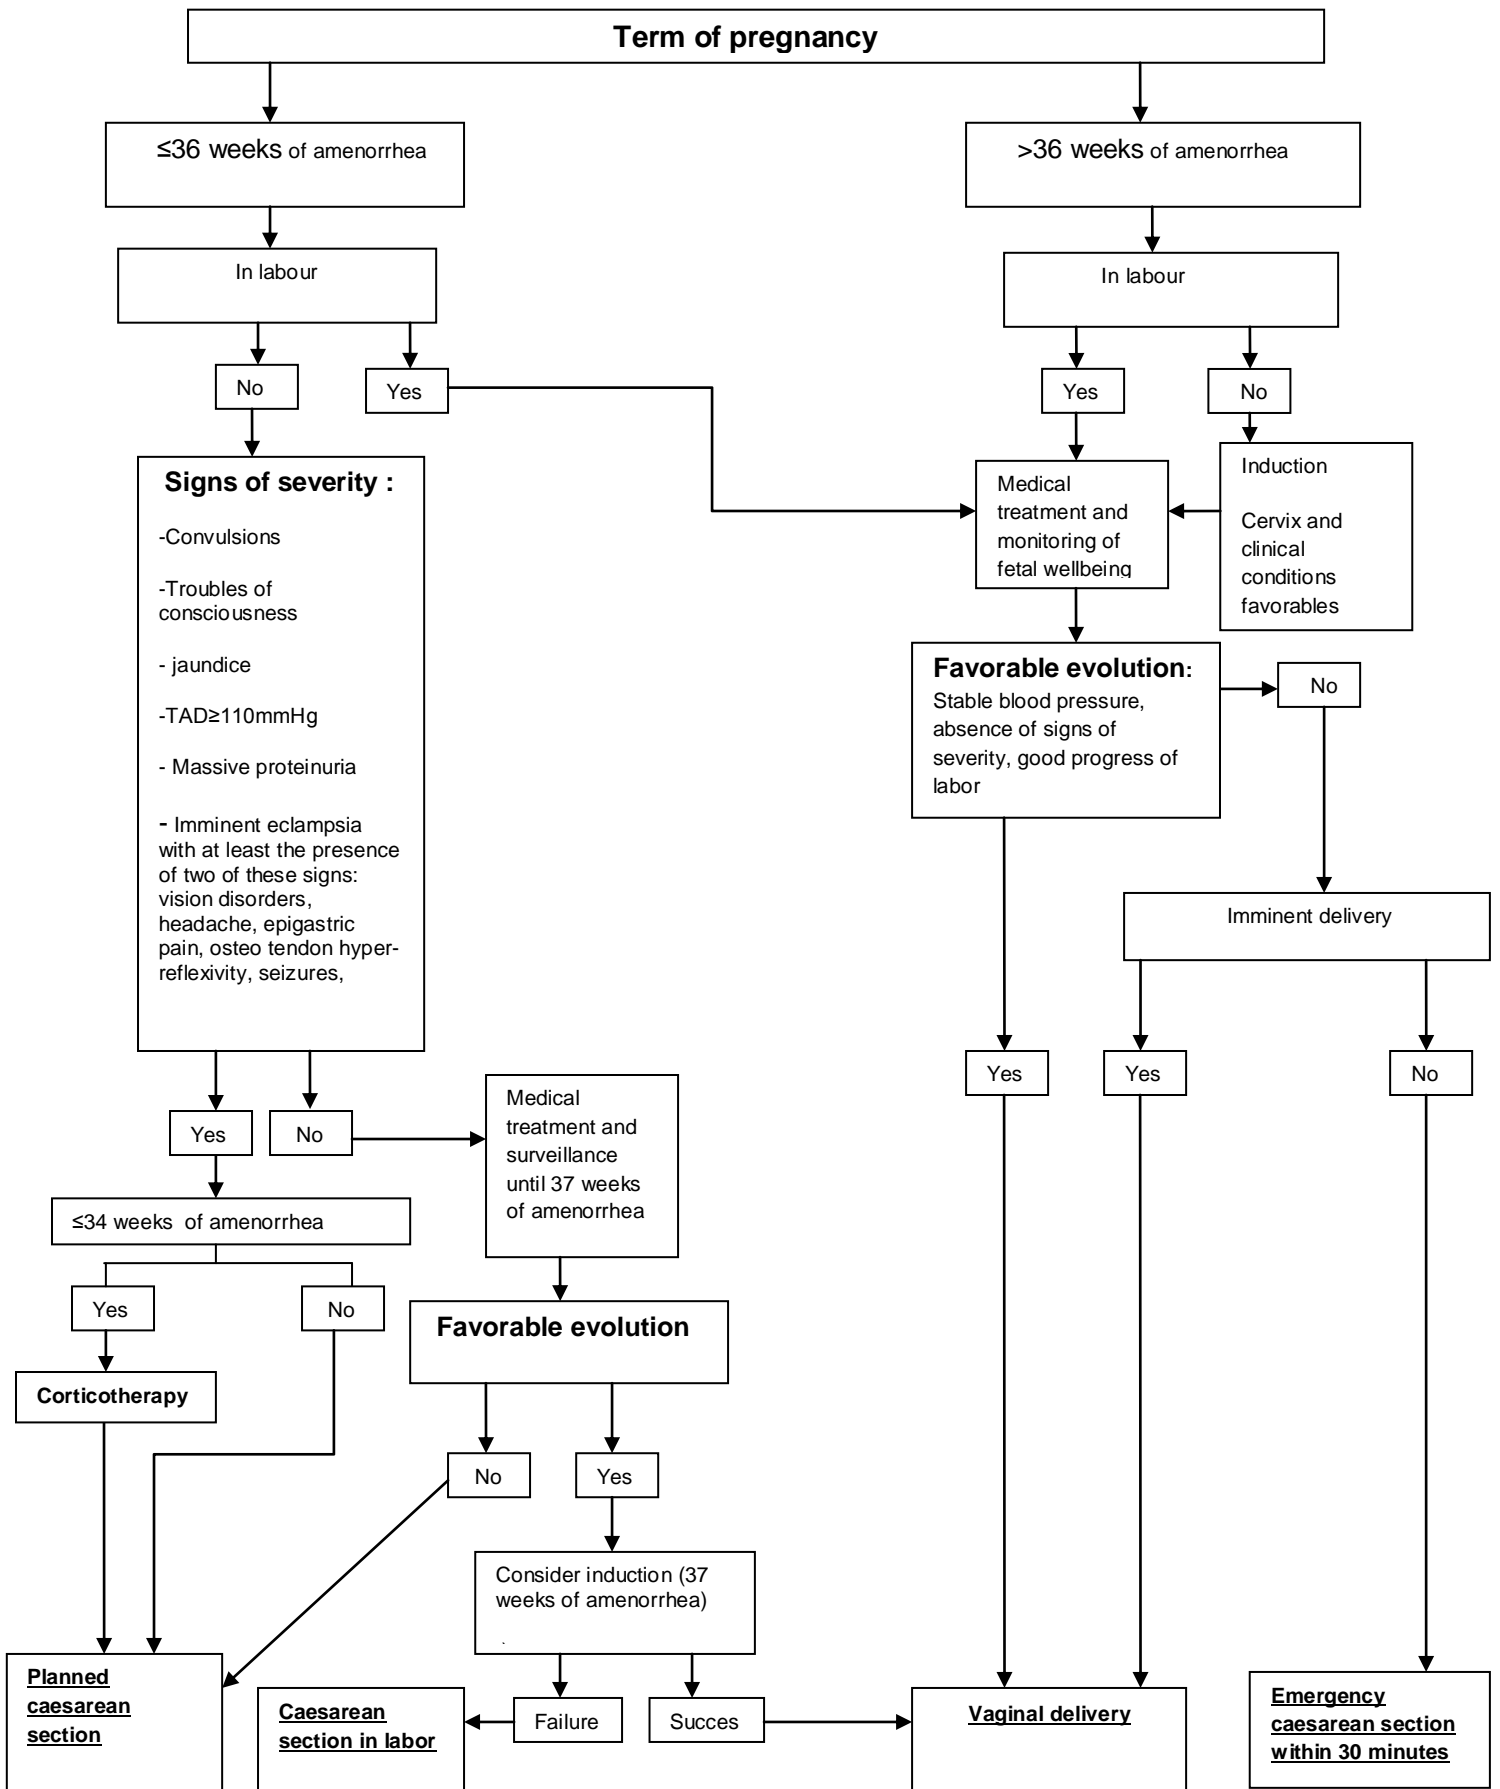

**Source: Recommendations for clinical practice of the African Society of Gynecology and Obstetrics (SAGO) and opinions of the group of experts**
